# Supplementary material
Source: HighWire-hosted journal article supplement (https://www.life-science-alliance.org/content/6/3/e202201583/F11)
Supplement: inline-supplementary-material-10 [file inline-supplementary-material-10.pdf]

|                    |         | 20nM         |         |              |             |                   |                            |  |
|--------------------|---------|--------------|---------|--------------|-------------|-------------------|----------------------------|--|
| <b>Replicate1.</b> | Hes1 Ct | Hes1 Ct mean | RPL7 Ct | RPL7 Ct mean | $\Delta Ct$ | $\Delta\Delta Ct$ | $RQ(2^{-\Delta\Delta Ct})$ |  |
| Scramble           | 25.25   | 25.256       | 15.398  | 15.396       | 9.86        | 0                 | <b>1</b>                   |  |
|                    | 25.26   |              | 15.39   |              |             |                   |                            |  |
|                    | 25.258  |              | 15.4    |              |             |                   |                            |  |
| Hes1 siRNA         | 25.89   | 25.896       | 15.74   | 15.74533333  | 10.15067    | 0.2907            | <b>0.817524195</b>         |  |
|                    | 25.898  |              | 15.746  |              |             |                   |                            |  |
|                    | 25.9    |              | 15.75   |              |             |                   |                            |  |
| <b>Replicate2.</b> | Hes1 Ct | Hes1 Ct mean | RPL7 Ct | RPL7 Ct mean | $\Delta Ct$ | $\Delta\Delta Ct$ | $RQ(2^{-\Delta\Delta Ct})$ |  |
| Scramble           | 25.6    | 25.60666667  | 15.36   | 15.36566667  | 10.241      | 0                 | <b>1</b>                   |  |
|                    | 25.62   |              | 15.367  |              |             |                   |                            |  |
|                    | 25.6    |              | 15.37   |              |             |                   |                            |  |
| Hes1 siRNA         | 25.92   | 25.92633333  | 15.93   | 15.93333333  | 9.993       | -0.248            | <b>1.187559666</b>         |  |
|                    | 25.93   |              | 15.934  |              |             |                   |                            |  |
|                    | 25.929  |              | 15.936  |              |             |                   |                            |  |
| <b>Replicate3.</b> | Hes1 Ct | Hes1 Ct mean | RPL7 Ct | RPL7 Ct mean | $\Delta Ct$ | $\Delta\Delta Ct$ | $RQ(2^{-\Delta\Delta Ct})$ |  |
| Scramble           | 25.35   | 25.33466667  | 15.61   | 15.616       | 9.718667    | 0                 | <b>1</b>                   |  |
|                    | 25.354  |              | 15.62   |              |             |                   |                            |  |
|                    | 25.3    |              | 15.618  |              |             |                   |                            |  |
| Hes1 siRNA         | 25.85   | 25.85633333  | 15.71   | 15.71133333  | 10.145      | 0.4263            | <b>0.744150672</b>         |  |
|                    | 25.86   |              | 15.714  |              |             |                   |                            |  |
|                    | 25.859  |              | 15.71   |              |             |                   |                            |  |

|                    |         | 100nM        |         |              |             |                   |                            |  |
|--------------------|---------|--------------|---------|--------------|-------------|-------------------|----------------------------|--|
| <b>Replicate1.</b> | Hes1 Ct | Hes1 Ct mean | RPL7 Ct | RPL7 Ct mean | $\Delta Ct$ | $\Delta\Delta Ct$ | $RQ(2^{-\Delta\Delta Ct})$ |  |
| Scramble           | 25.25   | 25.256       | 15.398  | 15.396       | 9.86        | 0                 | <b>1</b>                   |  |
|                    | 25.26   |              | 15.39   |              |             |                   |                            |  |
|                    | 25.258  |              | 15.4    |              |             |                   |                            |  |
| Hes1 siRNA         | 26.5    | 26.51666667  | 15.17   | 15.17333333  | 11.34333    | 1.107667          | <b>0.464043943</b>         |  |
|                    | 26.52   |              | 15.18   |              |             |                   |                            |  |
|                    | 26.53   |              | 15.17   |              |             |                   |                            |  |
| <b>Replicate2.</b> | Hes1 Ct | Hes1 Ct mean | RPL7 Ct | RPL7 Ct mean | $\Delta Ct$ | $\Delta\Delta Ct$ | $RQ(2^{-\Delta\Delta Ct})$ |  |
| Scramble           | 25.6    | 25.60666667  | 15.36   | 15.36566667  | 10.241      | 0                 | <b>1</b>                   |  |
|                    | 25.62   |              | 15.367  |              |             |                   |                            |  |
|                    | 25.6    |              | 15.37   |              |             |                   |                            |  |
| Hes1 siRNA         | 26.26   | 26.24066667  | 15.04   | 15.02866667  | 11.212      | 1.348333          | <b>0.392745504</b>         |  |
|                    | 26.262  |              | 15      |              |             |                   |                            |  |
|                    | 26.2    |              | 15.046  |              |             |                   |                            |  |
| <b>Replicate3.</b> | Hes1 Ct | Hes1 Ct mean | RPL7 Ct | RPL7 Ct mean | $\Delta Ct$ | $\Delta\Delta Ct$ | $RQ(2^{-\Delta\Delta Ct})$ |  |
| Scramble           | 25.35   | 25.33466667  | 15.61   | 15.616       | 9.718667    | 0                 | <b>1</b>                   |  |
|                    | 25.354  |              | 15.62   |              |             |                   |                            |  |
|                    | 25.3    |              | 15.618  |              |             |                   |                            |  |
| Hes1 siRNA         | 26.54   | 26.541       | 15.5    | 15.504       | 11.037      | 1.309             | <b>0.403600537</b>         |  |
|                    | 26.543  |              | 15.505  |              |             |                   |                            |  |
|                    | 26.54   |              | 15.507  |              |             |                   |                            |  |

200nM

| <b>Replicate1.</b> | Hes1 Ct | Hes1 Ct mean | RPL7 Ct | RPL7 Ct mean | $\Delta Ct$ | $\Delta\Delta Ct$ | $RQ(2^{-\Delta\Delta Ct})$ |
|--------------------|---------|--------------|---------|--------------|-------------|-------------------|----------------------------|
| Scramble           | 25.25   | 25.256       | 15.398  | 15.396       | 9.86        | 0                 | <b>1</b>                   |
|                    | 25.26   |              | 15.39   |              |             |                   |                            |
|                    | 25.258  |              | 15.4    |              |             |                   |                            |
| Hes1 siRNA         | 25.99   | 25.98933333  | 15.69   | 15.69366667  | 10.29567    | 0.435667          | <b>0.73935202</b>          |
|                    | 25.98   |              | 15.7    |              |             |                   |                            |
|                    | 25.998  |              | 15.691  |              |             |                   |                            |
| <b>Replicate2.</b> | Hes1 Ct | Hes1 Ct mean | RPL7 Ct | RPL7 Ct mean | $\Delta Ct$ | $\Delta\Delta Ct$ | $RQ(2^{-\Delta\Delta Ct})$ |
| Scramble           | 25.6    | 25.60666667  | 15.36   | 15.36566667  | 10.241      | 0                 | <b>1</b>                   |
|                    | 25.62   |              | 15.367  |              |             |                   |                            |
|                    | 25.6    |              | 15.37   |              |             |                   |                            |
| Hes1 siRNA         | 26.22   | 26.226       | 15.66   | 15.66066667  | 10.56533    | 0.324333          | <b>0.79866736</b>          |
|                    | 26.228  |              | 15.662  |              |             |                   |                            |
|                    | 26.23   |              | 15.66   |              |             |                   |                            |
| <b>Replicate3.</b> | Hes1 Ct | Hes1 Ct mean | RPL7 Ct | RPL7 Ct mean | $\Delta Ct$ | $\Delta\Delta Ct$ | $RQ(2^{-\Delta\Delta Ct})$ |
| Scramble           | 25.35   | 25.33466667  | 15.61   | 15.616       | 9.718667    | 0                 | <b>1</b>                   |
|                    | 25.354  |              | 15.62   |              |             |                   |                            |
|                    | 25.3    |              | 15.618  |              |             |                   |                            |
| Hes1 siRNA         | 25.93   | 25.93066667  | 15.34   | 15.343       | 10.58767    | 0.869             | <b>0.54752624</b>          |
|                    | 25.932  |              | 15.343  |              |             |                   |                            |
|                    | 25.93   |              | 15.346  |              |             |                   |                            |
